# Supplementary material for: Standardisation of information submitted to an endpoint committee for cause of death assignment in a cancer screening trial – lessons learnt from CAP (Cluster randomised triAl of PSA testing for Prostate cancer)
Source: PubMed Central journal article supplement (PMC4429825; doi:10.1186/1471-2288-15-6), 2015-01-23
Supplement: 12874_2014_1176_MOESM1_ESM.pdf [file 12874_2014_1176_MOESM1_ESM.pdf]

## Vignette for cause of death review

\* Categories affected by changes in vignette writing rules (see text)

|                                                            |                                                                                    |
|------------------------------------------------------------|------------------------------------------------------------------------------------|
| Study ID<br>Number<br><br>Initials<br><br>Date of<br>birth | Date of diagnosis<br>(of prostate cancer)<br><br>Date of death<br><br>Age at death |
|------------------------------------------------------------|------------------------------------------------------------------------------------|

| <b>Clinical features at diagnosis</b>                                                                                   |  |
|-------------------------------------------------------------------------------------------------------------------------|--|
| Symptoms at diagnosis (comment on presence of bony pain, weight loss, cachexia, loss of appetite, obstructive uraemia)* |  |
| Gleason Score at diagnosis (with dates)                                                                                 |  |
| Clinical stage (TNM)                                                                                                    |  |
| Pathological stage (TNM)                                                                                                |  |
| Co-morbidities with dates of diagnosis                                                                                  |  |
| Other primary cancers with dates of diagnosis                                                                           |  |
| PSA level at diagnosis with dates*                                                                                      |  |
| Radiological evidence of local spread at diagnosis                                                                      |  |
| Radiological evidence of metastases at diagnosis                                                                        |  |
| <b>Treatments received</b>                                                                                              |  |
| Initial treatments (dates)                                                                                              |  |
| Hormone therapy (start date)                                                                                            |  |
| Maximum androgen blockade (start date)                                                                                  |  |
| Orchidectomy (date)                                                                                                     |  |
| Chemotherapy (start date)                                                                                               |  |
| Treatment for complications of treating prostate cancer with dates (if available)                                       |  |
| <b>Prostate cancer progression</b>                                                                                      |  |
| Serial PSA levels (dates) – last 3 PSA measurements*                                                                    |  |

|                                                                                                            |  |
|------------------------------------------------------------------------------------------------------------|--|
| Serum testosterone                                                                                         |  |
| Radiological evidence of metastases                                                                        |  |
| Other indications or complications of disease progression                                                  |  |
| Date of recurrence following radical surgery or radiotherapy                                               |  |
| Palliative care referrals and treatments                                                                   |  |
| <b>Progression of co-morbidities</b>                                                                       |  |
| Treatment/ admission for co-morbidity with dates (if available)                                            |  |
| <b>End of life</b>                                                                                         |  |
| Symptoms in last 3-6 months (i.e. bone pain, weight loss, cachexia, loss of appetite, obstructive uraemia) |  |
| Last consultation: speciality & date                                                                       |  |
| Was a DS1500 report issued?                                                                                |  |
| <b>Post mortem findings</b>                                                                                |  |

**Summary:** Especially note any progression of prostate cancer or progression of co-morbidities, or any factors that may contribute to the cause of death.

---
